# Supplementary material
Source: HighWire-hosted journal article supplement (https://erj.ersjournals.com/content/55/1/1901450)
Supplement: inline-supplementary-material-1 [file inline-supplementary-material-1.pdf]

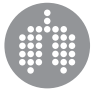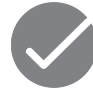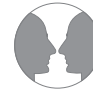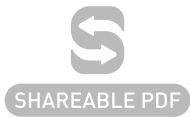

# Subpopulations of cells from bronchoalveolar lavage can predict prognosis in sarcoidosis

Pernilla Darlington <sup>1</sup>, Susanna Kullberg<sup>2</sup>, Anders Eklund<sup>2</sup> and Johan Grunewald<sup>2</sup>

**Affiliations:** <sup>1</sup>Respiratory Medicine Division, Dept of Clinical Science and Education, Södersjukhuset and Karolinska Institutet, Stockholm, Sweden. <sup>2</sup>Respiratory Medicine Division, Dept of Medicine Solna and Center for Molecular Medicine (CMM), Karolinska University Hospital and Karolinska Institutet, Stockholm, Sweden.

**Correspondence:** Pernilla Darlington, Respiratory Medicine Division, Dept of Medicine, Södersjukhuset, Stockholm, Sweden. E-mail: [pernilla.lidin-darlington@ssl.se](mailto:pernilla.lidin-darlington@ssl.se)

 @ERSpublications

**The higher the proportion of a T-cell subset (CD4<sup>+</sup>Vα2.3<sup>+</sup> T-cells) in bronchoalveolar lavage fluid of sarcoidosis patients, the better the prognosis and therefore it may be used as an additional prognostic tool** <http://bit.ly/2Mta0Cs>

**Cite this article as:** Darlington P, Kullberg S, Eklund A, *et al.* Subpopulations of cells from bronchoalveolar lavage can predict prognosis in sarcoidosis. *Eur Respir J* 2020; 55: 1901450 [<https://doi.org/10.1183/13993003.01450-2019>].

This single-page version can be shared freely online.

## To the Editor:

Sarcoidosis is characterised by an accumulation of CD4<sup>+</sup> T-cells in the lungs and an increased bronchoalveolar lavage fluid (BALF) CD4/CD8 ratio (>3.5) [1]. In sarcoidosis, an expansion of BALF CD4<sup>+</sup> T-cells expressing the T-cell receptor Vα2.3 has been associated with good prognosis and with specific HLA-alleles, *i.e.* HLA-DRB1\*0301 and HLA-DRB3\*0101 (which is often carried together with HLA-DRB1\*13). HLA-DRB1\*03 and HLA-DRB3\*0101 molecules show similarities in the region important for antigen presentation and both may therefore be capable of presenting identical antigens to the lung T-cells [2]. Furthermore, an expansion defined as >10.5% CD4<sup>+</sup> Vα2.3<sup>+</sup> BALF T-cells is commonly seen in patients with Löfgren's syndrome [3], which is characterised by an acute onset with bilateral ankle arthritis and/or erythema nodosum, bilateral hilar lymphadenopathy and, in some cases, with parenchymal infiltrates and usually fever [4]. We have previously shown that very high expansions of CD4<sup>+</sup> Vα2.3<sup>+</sup> T-cells are associated with Löfgren's syndrome and a disease duration <2 years [3]. However, not all patients with an expansion of CD4<sup>+</sup> Vα2.3<sup>+</sup> T-cells have Löfgren's syndrome and resolving disease. In this much enlarged study on a HLA-typed sarcoidosis cohort, we aimed at investigating the clinical characteristics of patients with an expansion of CD4<sup>+</sup> Vα2.3<sup>+</sup> T-cells in BALF and to analyse if the degree of expansion may predict the prognosis of sarcoidosis.
